# Supplementary material for: Inflammatory bowel disease biomarkers of human gut microbiota selected via different feature selection methods
Source: PeerJ journal article supplement (doi:10.7717/peerj.13205), 2022-04-25

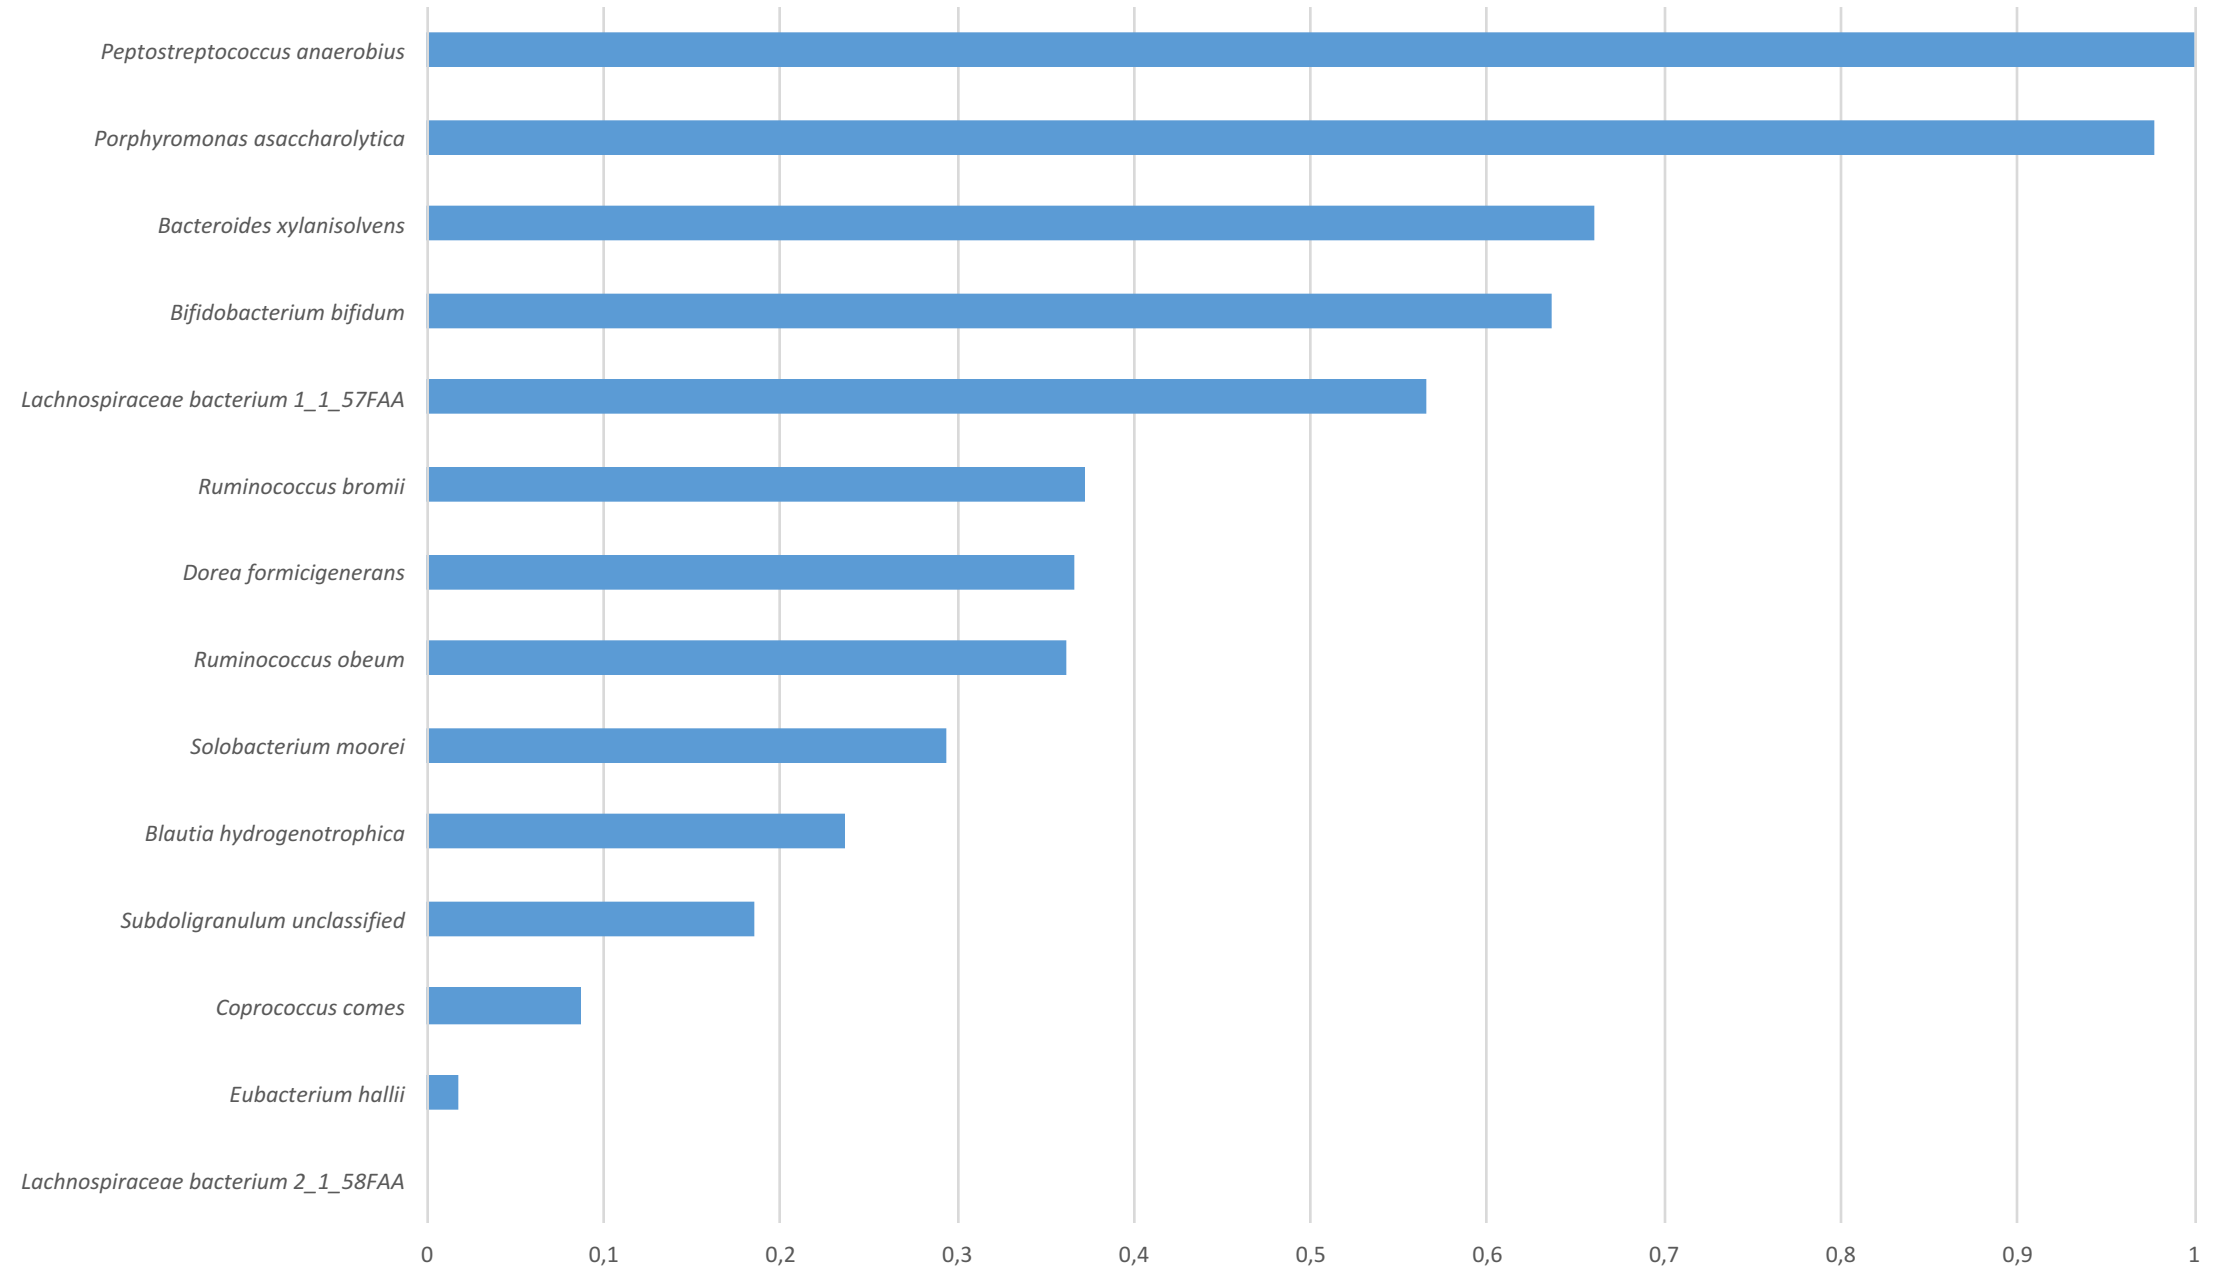

Supplement: Supplementary_Figure_1.pdf [file Supplementary_Figure_1.pdf]
